# Supplementary material for: The impact of endogenous annexin A1 on glucocorticoid control of inflammatory arthritis
Source: HighWire-hosted journal article supplement (doi:10.1136/annrheumdis-2011-201180), 2012-10-05
Supplement: annrheumdis-2011-201180_ds1.pdf [file annrheumdis-2011-201180_ds1.pdf]

# Figure S1

Figure S1. H&E staining of a normal non-arthritis and KxB/N arthritis knee joint

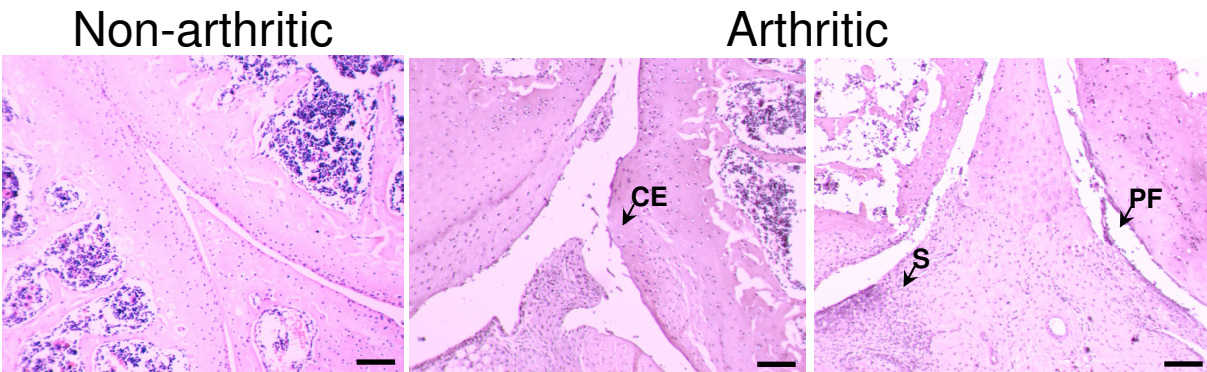

Mice were given an i.p. injection of 50  $\mu$ l at day 0 and day 2 (50+50  $\mu$ l) K/BxN serum. Knees of naïve and 50+50  $\mu$ l K/BxN serum group, taken at day 20 endpoint were decalcified and paraffin embedded. Sections were stained by H&E. Representative images are shown here. Scale bars; 60  $\mu$ M

# Table S1

**Table S1. Arthritic disease incidence following low volume K/BxN serum administration**

| Time (days) | 50+50 $\mu$ l K/BxN serum | 200 $\mu$ l K/BxN serum |
|-------------|---------------------------|-------------------------|
| 0           | 0% (0/8)                  | 0% (0/8)                |
| 6           | 100% (8/8)                | 85.7% (6/7)             |
| 10          | 75% (3/4)                 | 66.6% (2/3)             |
| 20          | 0% (0/4)                  | 0% (0/3)                |

Data report the number of mice with a severe arthritic score, taking a threshold  $\geq 8$ . Mice were given an i.p. injection of 50  $\mu$ l at day 0 and day 2 (50+50  $\mu$ l) or 200  $\mu$ l at day 0 of K/BxN serum.

## Table S2

**Table S2.** Expression of elements of the AnxA1 pathway in naïve ankle joints by quantitative PCR (data normalised to housekeeping genes *Gapdh* or *Rpl32*)

| Gene of Interest | Cycle threshold (Ct) | Difference normalised to <i>Gapdh</i> ( $\Delta$ Ct) | Difference normalised to <i>Rpl32</i> ( $\Delta$ Ct) |
|------------------|----------------------|------------------------------------------------------|------------------------------------------------------|
| <i>Gapdh</i>     | 18.6 $\pm$ 0.32      | ---                                                  | ---                                                  |
| <i>Rpl32</i>     | 18.4 $\pm$ 0.16      | ---                                                  | ---                                                  |
| <i>Fpr1</i>      | 30.7 $\pm$ 0.69      | 12.1 $\pm$ 0.73                                      | 12.3 $\pm$ 0.60                                      |
| <i>Fpr2</i>      | 30.4 $\pm$ 0.68      | 11.8 $\pm$ 0.77                                      | 12.0 $\pm$ 0.57                                      |
| <i>Anxa1</i>     | 21.0 $\pm$ 0.15      | 2.4 $\pm$ 0.42                                       | 2.6 $\pm$ 0.05                                       |

Data report the gene expression of elements of the AnxA1 pathway. Naïve mice were culled and quantitative real-time PCR was performed on cDNA from left ankle joints. Data are mean  $\pm$  SE of 4 mice per group. Ct values were normalised to endogenous *Gapdh* and *Rpl32*.

# Figure S2

Figure S2. Inhibition of K/BxN arthritis by dexamethasone

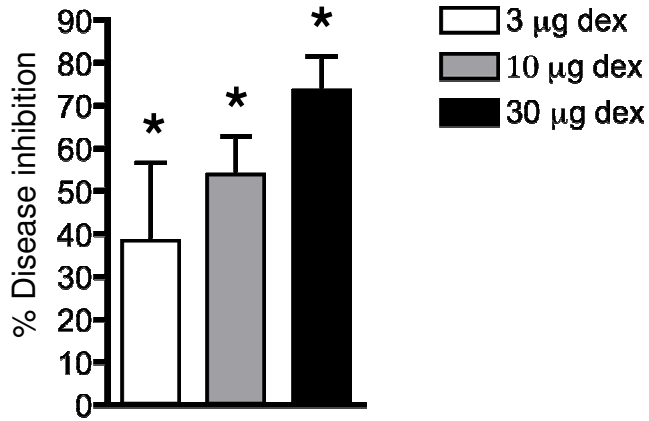

Data report percentage disease inhibition in Dex groups relative to vehicle control at day 6. Mice were given an i.p. injection of 50 µl at day 0 and day 2 (50+50 µl) of K/BxN serum and then received vehicle or Dex (3, 10 or 30 µg i.p. daily).

## Figure S3

**Figure S3** Dexamethasone attenuates K/BxN arthritis in *AnxA1*<sup>+/+</sup> but not *AnxA1*<sup>-/-</sup> mice (data normalised to housekeeping gene *Rpl32*)

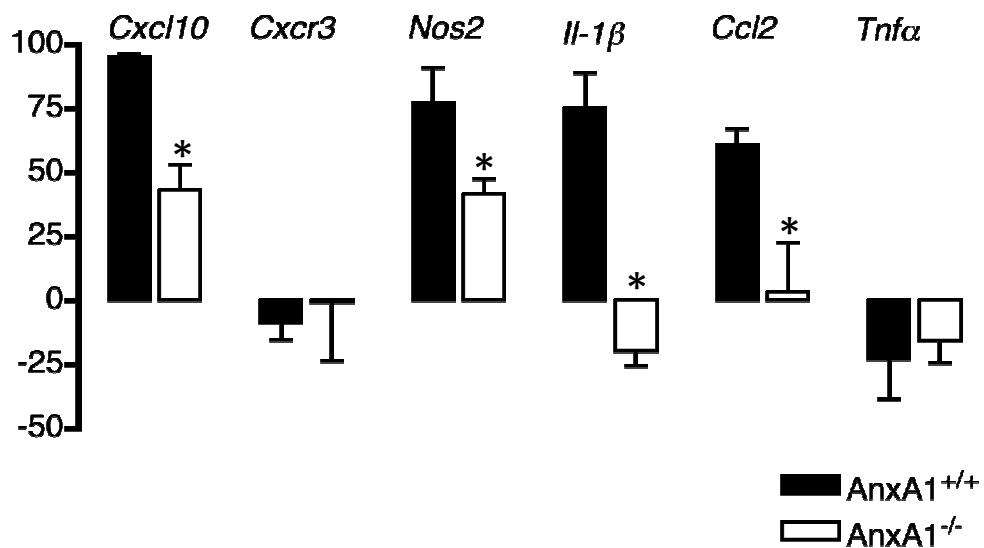

Mice were given an i.p. injection of 50  $\mu$ l at day 0 and day 2 (50+50  $\mu$ l) K/BxN serum and then received vehicle or Dex (10  $\mu$ g i.p. daily). Quantitative real-time PCR was performed on cDNA from left ankle joints of mice from each experimental group (Day 10); pro-inflammatory genes were analysed with all Ct values normalised to endogenous *Rpl32* (4 mice per group). RQ values were calculated using  $2^{-(\Delta\Delta Ct)}$  and data shown here as mean % gene inhibition by Dex relative to vehicle control groups  $\pm$  SE. Naïve joints were set as the calibrator samples. \* $p < 0.05$  vs. respective vehicle control (Student's *t* test).

# Table S3

**Table S3. Arthritic disease incidence in AnxA1<sup>+/+</sup> and AnxA1<sup>-/-</sup> mice treated with Dex**

| Time (days) | AnxA1 <sup>+/+</sup> + Vehicle control | AnxA1 <sup>+/+</sup> + Dexamethasone | AnxA1 <sup>-/-</sup> + Vehicle control | AnxA1 <sup>-/-</sup> + Dexamethasone |
|-------------|----------------------------------------|--------------------------------------|----------------------------------------|--------------------------------------|
| 0           | 0% (0/3)                               | 0% (0/4)                             | 0% (0/4)                               | 0% (0/4)                             |
| 6           | 66.7% (2/3)                            | 0% (0/4)                             | 75% (3/4)                              | 75% (3/4)                            |
| 10          | 66.7% (2/3)                            | 0% (0/4)                             | 75% (3/4)                              | 25% (1/4)                            |

Data report the number of mice with a severe arthritic score, taking a threshold  $\geq 8$ .

AnxA1<sup>+/+</sup> and AnxA1<sup>-/-</sup> mice were given an i.p. injection of 50  $\mu$ l at day 0 and day 2 (50+50  $\mu$ l) and then received vehicle or Dex (10  $\mu$ g i.p. daily).

## Figure S4

**Figure S4. Profile of *Anxa1*, *Fpr1* and *Fpr2* gene product expression in ankle joints of *AnxA1*<sup>+/+</sup> and *AnxA1*<sup>-/-</sup> mice treated with Dex mice (data normalised to housekeeping gene *Rpl32*)**

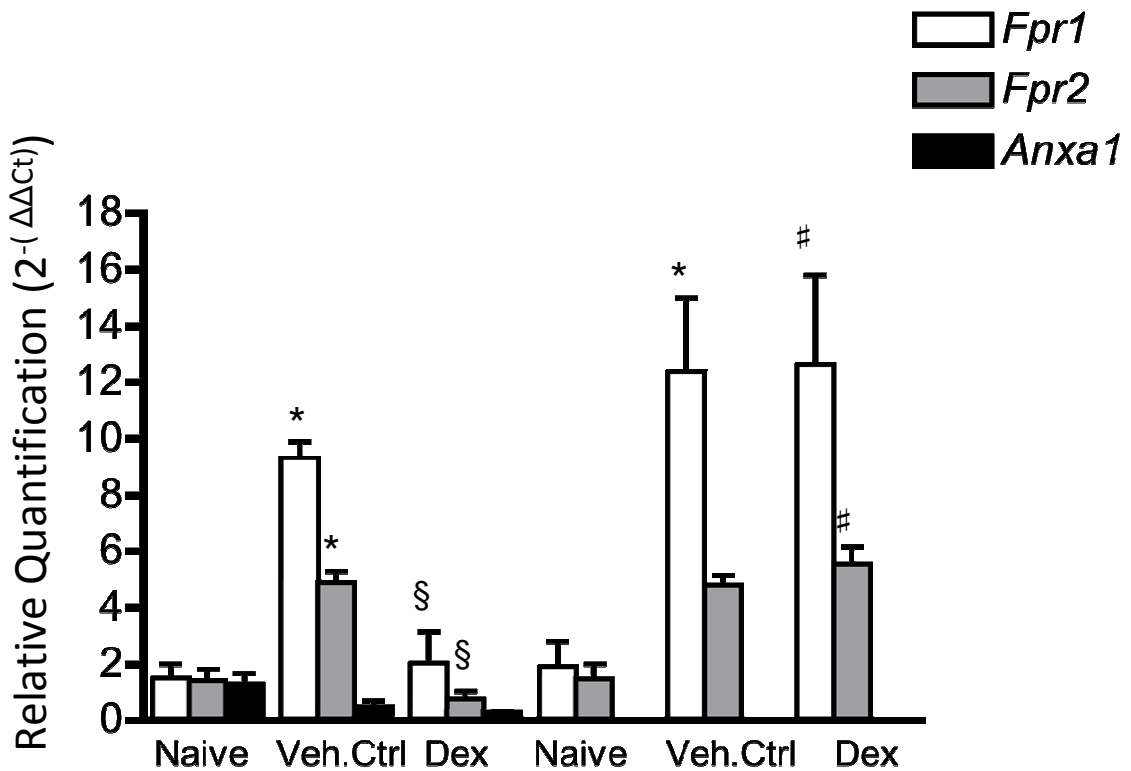

*AnxA1*<sup>+/+</sup> and *AnxA1*<sup>-/-</sup> mice were given an i.p. injection of 50  $\mu$ l at day 0 and day 2 (50+50  $\mu$ l) K/BxN serum and then received vehicle or Dex (10  $\mu$ g i.p. daily). Quantitative real-time PCR was performed on cDNA from left ankle joints of mice from each experimental group (Day 10); The *Anxa1*, *Fpr1* and *Fpr2* genes were analysed with all Ct values normalised to endogenous *Rpl32* (4 mice per group). Mean RQ values  $\pm$  SE were calculated using  $2^{-(\Delta\Delta Ct)}$  method. Naïve joints were set as the calibrator samples. \* $p < 0.05$  vs. respective vehicle control (Student's *t* test). \* $p < 0.05$  vs. naïve; § $p < 0.05$  vs. appropriate vehicle control; # $p < 0.05$  vs. *AnxA1*<sup>+/+</sup> group (Student's *t* test).

## Figure S5

**Figure S5.** Profile of *Pr3* gene product expression in ankle joints of *AnxA1*<sup>+/+</sup> mice over time-course of K/BxN time-course (data normalised to housekeeping gene *Rpl32*)

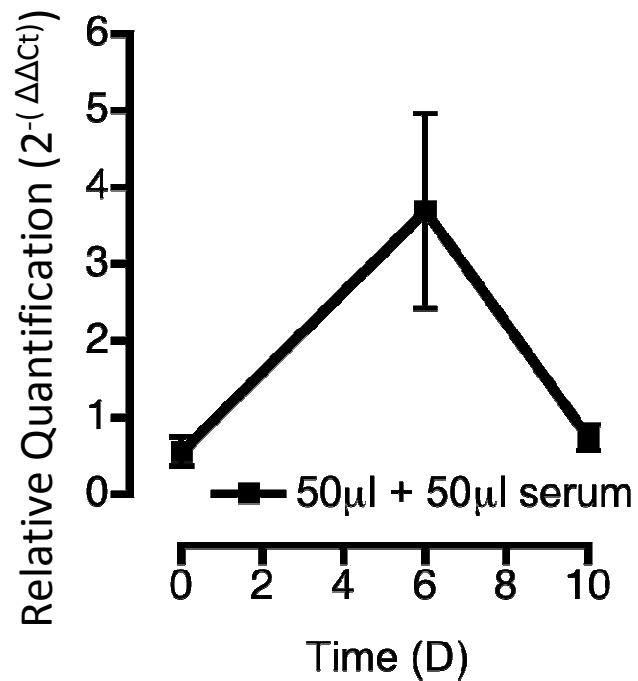

*AnxA1*<sup>+/+</sup> mice were given an i.p. injection of 50  $\mu$ l at day 0 and day 2 (50+50  $\mu$ l) K/BxN serum. Quantitative real-time PCR was performed on cDNA from left ankle joints of mice at day 0 (naive), day 6 and day 10; the *Pr3* gene was analysed with all Ct values normalised to endogenous *Rpl32* (6 mice per group). Mean RQ values  $\pm$  SE were calculated using  $2^{-(\Delta\Delta Ct)}$  method. Naïve joints were set as the calibrator samples.



# Figure S6

**Figure S6. SuperAnxA1 attenuates pro-inflammatory mediators in K/BxN arthritic ankle joints**

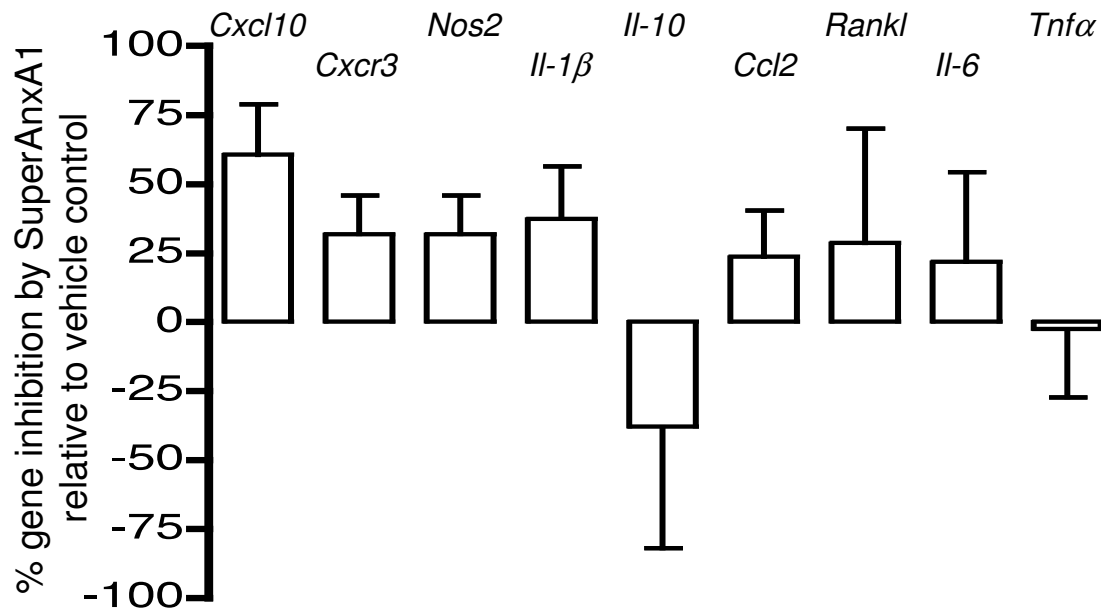

Mice were given an i.p. injection of 50  $\mu$ l at day 0 and day 2 (50+50  $\mu$ l) K/BxN serum and then received vehicle control or SuperAnxA1 (1  $\mu$ g i.p. daily) (n=6 per group). Quantitative real-time PCR was performed on cDNA from left ankle joints of mice from each experimental group (Day 10); pro-inflammatory genes were analysed with all Ct values normalised to endogenous *Gapdh* (six mice per group). RQ values were calculated using  $2^{-(\Delta\Delta Ct)}$  and data shown here as mean % gene inhibition by SuperAnxA1 relative to vehicle control group  $\pm$  SE.
